# Supplementary material
Source: publisher site journal article supplement (https://www.dovepress.com/article/501429)
Supplement: Supplementary file 1 [file get_supplementary_file.php]

**Supplementary table 1 Threshold effect analysis of other indices on CAC using a two-part logistic regression model.**

| dNLR | Adjusted OR(95%), p |
| --- | --- |
| Model 1 Fitting model by standard linear regression | 3.287(0.5-21.573), p=0.215 |
| Model 2 Fitting model by two-piecewise linear regression |  |
| Inflection point | 0.881 |
| <0.881 | 7.304(0.567-92.973), p=0.126 |
| >0.881 | 0.248(0.001-90.827), p=0.642 |
| p for likelihood ratio test | p=0.364 |
| NLR | Adjusted OR(95%), p |
| Model 1 Fitting model by standard linear regression | 1.072(1.02-1.135) p=0.011 |
| Model 2 Fitting model by two-piecewise linear regression |  |
| Inflection point | 2.748 |
| <2.748 | 1.124(0.948-1.332), p=0.177 |
| >2.748 | 1.06(1.002-1.137), p=0.069 |
| p for likelihood ratio test | p=0.565 |
| NMLR | Adjusted OR(95%), p |
| Model 1 Fitting model by standard linear regression | 1.07(1.02-1.129), p<0.01 |
| Model 2 Fitting model by two-piecewise linear regression |  |
| Inflection point | 2.919 |
| <2.919 | 1.139(0.961-1.349), p=0.132 |
| >2.919 | 1.055(1.001-1.126), p=0.072 |
| p for likelihood ratio test | p=0.446 |
| SIRI | Adjusted OR(95%), p |
| Model 1 Fitting model by standard linear regression | 1.145(1.05-1.264), p<0.01 |
| Model 2 Fitting model by two-piecewise linear regression |  |
| Inflection point | 0.99 |
| <0.99 | 1.703(1.104-2.623), p=0.016 |
| >0.99 | 1.093(1.009-1.214), p=0.064 |
| p for likelihood ratio test | P=0.066 |
| SII | Adjusted OR(95%), p |
| Model 1 Fitting model by standard linear regression | 1(1-1), p=0.042 |
| Model 2 Fitting model by two-piecewise linear regression |  |
| Inflection point | 375.707 |
| <375.707 | 1.001(0.999-1.002), p=0.299 |
| >375.707 | 1(1-1), p=0.094 |
| p for likelihood ratio test | P=0.452 |
| AISI | Adjusted OR(95%), p |
| Model 1 Fitting model by standard linear regression | 1(1-1.001), p=0.011 |
| Model 2 Fitting model by two-piecewise linear regression |  |
| Inflection point | 117.073 |
| <117.073 | 1.004(0.999-1.008), p=0.11 |
| >117.073 | 1(1-1.001), p=0.034 |
| p for likelihood ratio test | P=0.162 |
| PLR | Adjusted OR(95%), p |
| Model 1 Fitting model by standard linear regression | 1(0.999-1.002), p=0.659 |
| Model 2 Fitting model by two-piecewise linear regression |  |
| Inflection point | 244.144 |
| <244.144 | 1(0.998-1.002), p=0.871 |
| >244.144 | 1.001(0.998-1.005), p=0.437 |
| p for likelihood ratio test | P=0.509 |

Adjusted for sex, age, hypertention, diabetes. smoking, drinking, LDL, HDL, Tch, UA, eGFR, Cr, Alb, ALP, HbA1c, GLU, Na, K, Pi, Cl, peripheral artery plaque.

**Supplementary table 2 Subgroup analysis results of other indices and CAC.**

| Variable | Count | Percent(%) | OR(95%CI) | p | p for interaction |
| --- | --- | --- | --- | --- | --- |
| NLR | 2143 | 100 | 1.08(1.03,1.14) | 0.005 |  |
| Age |  |  |  |  | 0.421 |
| ＞65 | 978 | 45.6 | 1.06(0.99,1.14) |  |  |
| ≤65 | 1165 | 54.4 | 1.1(1.03,1.19) |  |  |
| Sex |  |  |  |  | 0.619 |
| male | 874 | 40.8 | 1.09(1.01,1.2) |  |  |
| female | 1269 | 59.2 | 1.07(1,1.15) |  |  |
| Diabetes |  |  |  |  | 0.865 |
| no | 1448 | 67.6 | 1.07(1.01,1.15) |  |  |
| yes | 695 | 32.4 | 1.09(1.01,1.22) |  |  |
| Hypertention |  |  |  |  | 0.874 |
| no | 721 | 33.6 | 1.06(0.99,1.16) |  |  |
| yes | 1422 | 66.4 | 1.08(1.02,1.16) |  |  |
| Smoking |  |  |  |  | 0.338 |
| no | 1248 | 58.2 | 1.1(1.03,1.18) |  |  |
| yes | 895 | 41.8 | 1.04(0.97,1.14) |  |  |
| Drinking |  |  |  |  | 0.209 |
| no | 1339 | 62.5 | 1.11(1.04,1.2) |  |  |
| yes | 804 | 37.5 | 1.04(0.96,1.13) |  |  |
| Hyperlipidemia |  |  |  |  | 0.744 |
| no | 1218 | 56.8 | 1.08(1.02,1.16) |  |  |
| yes | 925 | 43.2 | 1.06(0.99,1.17) |  |  |
| Peripheral artery plaque |  |  |  |  | 0.309 |
| no | 613 | 28.6 | 1.11(1.03,1.22) |  |  |
| yes | 1530 | 71.4 | 1.05(0.99,1.13) |  |  |
| Variable | Count | Percent(%) | OR(95%CI) | p | p for interaction |
| dNLR | 2143 | 100 | 1.87(0.29,11.95) | 0.508 |  |
| Age |  |  |  |  | 0.417 |
| ＞65 | 978 | 45.6 | 3.75(0.25,54.71） |  |  |
| ≤65 | 1165 | 54.4 | 1.09（0.08，14.23） |  |  |
| Sex |  |  |  |  | 0.555 |
| male | 874 | 40.8 | 4.05（0.24，69.49） |  |  |
| female | 1269 | 59.2 | 1.06（0.09，12.63） |  |  |
| Diabetes |  |  |  |  | 0.152 |
| no | 1448 | 67.6 | 0.75（0.08，6.91） |  |  |
| yes | 695 | 32.4 | 13.82（0.46，409.22） |  |  |
| Hypertention |  |  |  |  | 0.238 |
| no | 721 | 33.6 | 0.58（0.02，13.82） |  |  |
| yes | 1422 | 66.4 | 3.64（0.37，35.82） |  |  |
| Smoking |  |  |  |  | 0.2 |
| no | 1248 | 58.2 | 5.69（0.52，61.97） |  |  |
| yes | 895 | 41.8 | 0.37（0.02，7.34） |  |  |
| Drinking |  |  |  |  | 0.022 |
| no | 1339 | 62.5 | 9.96（0.98，101.83） |  |  |
| yes | 804 | 37.5 | 0.1（0，2.45) |  |  |
| Hyperlipidemia |  |  |  |  | 0.627 |
| no | 1218 | 56.8 | 2.68(0.23,30.39) |  |  |
| yes | 925 | 43.2 | 1.05(0.06,18.82) |  |  |
| Peripheral artery plaque |  |  |  |  | 0.277 |
| no | 613 | 28.6 | 9.92(0.28,366.73) |  |  |
| yes | 1530 | 71.4 | 1.01(0.11,8.92) |  |  |
| Variable | Count | Percent(%) | OR(95%CI) | p | p for interaction |
| NMLR | 2143 | 100 | 1.07（1.03，1.13） | 0.004 |  |
| Age |  |  |  |  | 0.387 |
| ＞65 | 978 | 45.6 | 1.05（0.99，1.13） |  |  |
| ≤65 | 1165 | 54.4 | 1.1（1.03，1.18） |  |  |
| Sex |  |  |  |  | 0.6 |
| male | 874 | 40.8 | 1.09（1.01，1.19） |  |  |
| female | 1269 | 59.2 | 1.07（1.01，1.14） |  |  |
| Diabetes |  |  |  |  | 0.901 |
| no | 1448 | 67.6 | 1.07（1.01，1.14） |  |  |
| yes | 695 | 32.4 | 1.09（1.01，1.21） |  |  |
| Hypertention |  |  |  |  | 0.914 |
| no | 721 | 33.6 | 1.06（0.99，1.16） |  |  |
| yes | 1422 | 66.4 | 1.08（1.02，1.16） |  |  |
| Smoking |  |  |  |  | 0.356 |
| no | 1248 | 58.2 | 1.09（1.03，1.17） |  |  |
| yes | 895 | 41.8 | 1.05（0.97，1.14） |  |  |
| Drinking |  |  |  |  | 0.263 |
| no | 1339 | 62.5 | 1.1（1.03，1.18） |  |  |
| yes | 804 | 37.5 | 1.05（0.97，1.13） |  |  |
| Hyperlipidemia |  |  |  |  | 0.758 |
| no | 1218 | 56.8 | 1.08（1.02，1.15） |  |  |
| yes | 925 | 43.2 | 1.06（0.99，1.17） |  |  |
| Peripheral artery plaque |  |  |  |  | 0.312 |
| no | 613 | 28.6 | 1.11（1.03，1.21） |  |  |
| yes | 1530 | 71.4 | 1.05（0.99，1.12） |  |  |
| Variable | Count | Percent(%) | OR(95%CI) | p | p for interaction |
| SIRI | 2143 | 100 | 1.15(1.05，1.26) | 0.003 |  |
| Age |  |  |  |  | 0.787 |
| ＞65 | 978 | 45.6 | 1.14(1.02,1.33) |  |  |
| ≤65 | 1165 | 54.4 | 1.15(1.04,1.31) |  |  |
| Sex |  |  |  |  | 0.405 |
| male | 874 | 40.8 | 1.21(1.03,1.48) |  |  |
| female | 1269 | 59.2 | 1.13(1.03,1.26) |  |  |
| Diabetes |  |  |  |  | 0.312 |
| no | 1448 | 67.6 | 1.11(1.02,1.24) |  |  |
| yes | 695 | 32.4 | 1.26(1.06,1.54) |  |  |
| Hypertention |  |  |  |  | 0.563 |
| no | 721 | 33.6 | 1.09(0.99,1.27) |  |  |
| yes | 1422 | 66.4 | 1.18(1.06,1.34) |  |  |
| Smoking |  |  |  |  | 0.529 |
| no | 1248 | 58.2 | 1.18(1.04,1.36) |  |  |
| yes | 895 | 41.8 | 1.12(1.01,1.27) |  |  |
| Drinking |  |  |  |  | 0.87 |
| no | 1339 | 62.5 | 1.15(1.03,1.32) |  |  |
| yes | 804 | 37.5 | 1.15(1.03,1.32) |  |  |
| Hyperlipidemia |  |  |  |  | 0.628 |
| no | 1218 | 56.8 | 1.17(1.06,1.32） |  |  |
| yes | 925 | 43.2 | 1.1（1，1.32） |  |  |
| Peripheral artery plaque |  |  |  |  | 0.7 |
| no | 613 | 28.6 | 1.16（1.03，1.38） |  |  |
| yes | 1530 | 71.4 | 1.13（1.02，1.28） |  |  |
| Variable | Count | Percent(%) | OR(95%CI) | p | p for interaction |
| SII | 2143 | 100 | 1(1,1) | 0.027 |  |
| Age |  |  |  |  | 0.903 |
| ＞65 | 978 | 45.6 | 1(1,1) |  |  |
| ≤65 | 1165 | 54.4 | 1(1,1) |  |  |
| Sex |  |  |  |  | 0.41 |
| male | 874 | 40.8 | 1(1,1) |  |  |
| female | 1269 | 59.2 | 1(1,1) |  |  |
| Diabetes |  |  |  |  | 0.932 |
| no | 1448 | 67.6 | 1(1,1) |  |  |
| yes | 695 | 32.4 | 1(1,1) |  |  |
| Hypertention |  |  |  |  | 0.997 |
| no | 721 | 33.6 | 1(1,1) |  |  |
| yes | 1422 | 66.4 | 1(1,1) |  |  |
| Smoking |  |  |  |  | 0.294 |
| no | 1248 | 58.2 | 1(1,1) |  |  |
| yes | 895 | 41.8 | 1(1,1) |  |  |
| Drinking |  |  |  |  | 0.865 |
| no | 1339 | 62.5 | 1(1,1) |  |  |
| yes | 804 | 37.5 | 1(1,1) |  |  |
| Hyperlipidemia |  |  |  |  | 0.625 |
| no | 1218 | 56.8 | 1(1,1) |  |  |
| yes | 925 | 43.2 | 1(1,1) |  |  |
| Peripheral artery plaque |  |  |  |  | 0.345 |
| no | 613 | 28.6 | 1(1,1) |  |  |
| yes | 1530 | 71.4 | 1(1,1) |  |  |
| Variable | Count | Percent(%) | OR(95%CI) | p | p for interaction |
| AISI | 2143 | 100 | 1(1,1) | 0.011 |  |
| Age |  |  |  |  | 0.847 |
| ＞65 | 978 | 45.6 | 1(1,1) |  |  |
| ≤65 | 1165 | 54.4 | 1(1,1) |  |  |
| Sex |  |  |  |  | 0.337 |
| male | 874 | 40.8 | 1(1,1) |  |  |
| female | 1269 | 59.2 | 1(1,1) |  |  |
| Diabetes |  |  |  |  | 0.446 |
| no | 1448 | 67.6 | 1(1,1) |  |  |
| yes | 695 | 32.4 | 1(1,1) |  |  |
| Hypertention |  |  |  |  | 0.755 |
| no | 721 | 33.6 | 1(1,1) |  |  |
| yes | 1422 | 66.4 | 1(1,1) |  |  |
| Smoking |  |  |  |  | 0.59 |
| no | 1248 | 58.2 | 1(1,1) |  |  |
| yes | 895 | 41.8 | 1(1,1) |  |  |
| Drinking |  |  |  |  | 0.422 |
| no | 1339 | 62.5 | 1(1,1) |  |  |
| yes | 804 | 37.5 | 1(1,1) |  |  |
| Hyperlipidemia |  |  |  |  | 0.353 |
| no | 1218 | 56.8 | 1(1,1) |  |  |
| yes | 925 | 43.2 | 1(1,1) |  |  |
| Peripheral artery plaque |  |  |  |  | 0.801 |
| no | 613 | 28.6 | 1(1,1) |  |  |
| yes | 1530 | 71.4 | 1(1,1) |  |  |
| Variable | Count | Percent(%) | OR(95%CI) | p | p for interaction |
| PLR | 2143 | 100 | 1(1,1) | 0.606 |  |
| Age |  |  |  |  | 0.301 |
| ＞65 | 978 | 45.6 | 1(1,1) |  |  |
| ≤65 | 1165 | 54.4 | 1(1,1) |  |  |
| Sex |  |  |  |  | 0.678 |
| male | 874 | 40.8 | 1(1,1) |  |  |
| female | 1269 | 59.2 | 1(1,1) |  |  |
| Diabetes |  |  |  |  | 0.653 |
| no | 1448 | 67.6 | 1(1,1) |  |  |
| yes | 695 | 32.4 | 1(1,1) |  |  |
| Hypertention |  |  |  |  | 0.548 |
| no | 721 | 33.6 | 1(1,1) |  |  |
| yes | 1422 | 66.4 | 1(1,1) |  |  |
| Smoking |  |  |  |  | 0.285 |
| no | 1248 | 58.2 | 1(1,1) |  |  |
| yes | 895 | 41.8 | 1(1,1) |  |  |
| Drinking |  |  |  |  | 0.545 |
| no | 1339 | 62.5 | 1(1,1) |  |  |
| yes | 804 | 37.5 | 1(1,1) |  |  |
| Hyperlipidemia |  |  |  |  | 0.935 |
| no | 1218 | 56.8 | 1(1,1) |  |  |
| yes | 925 | 43.2 | 1(1,1) |  |  |
| Peripheral artery plaque |  |  |  |  | 0.08 |
| no | 613 | 28.6 | 1(1,1) |  |  |
| yes | 1530 | 71.4 | 1(1,1) |  |  |


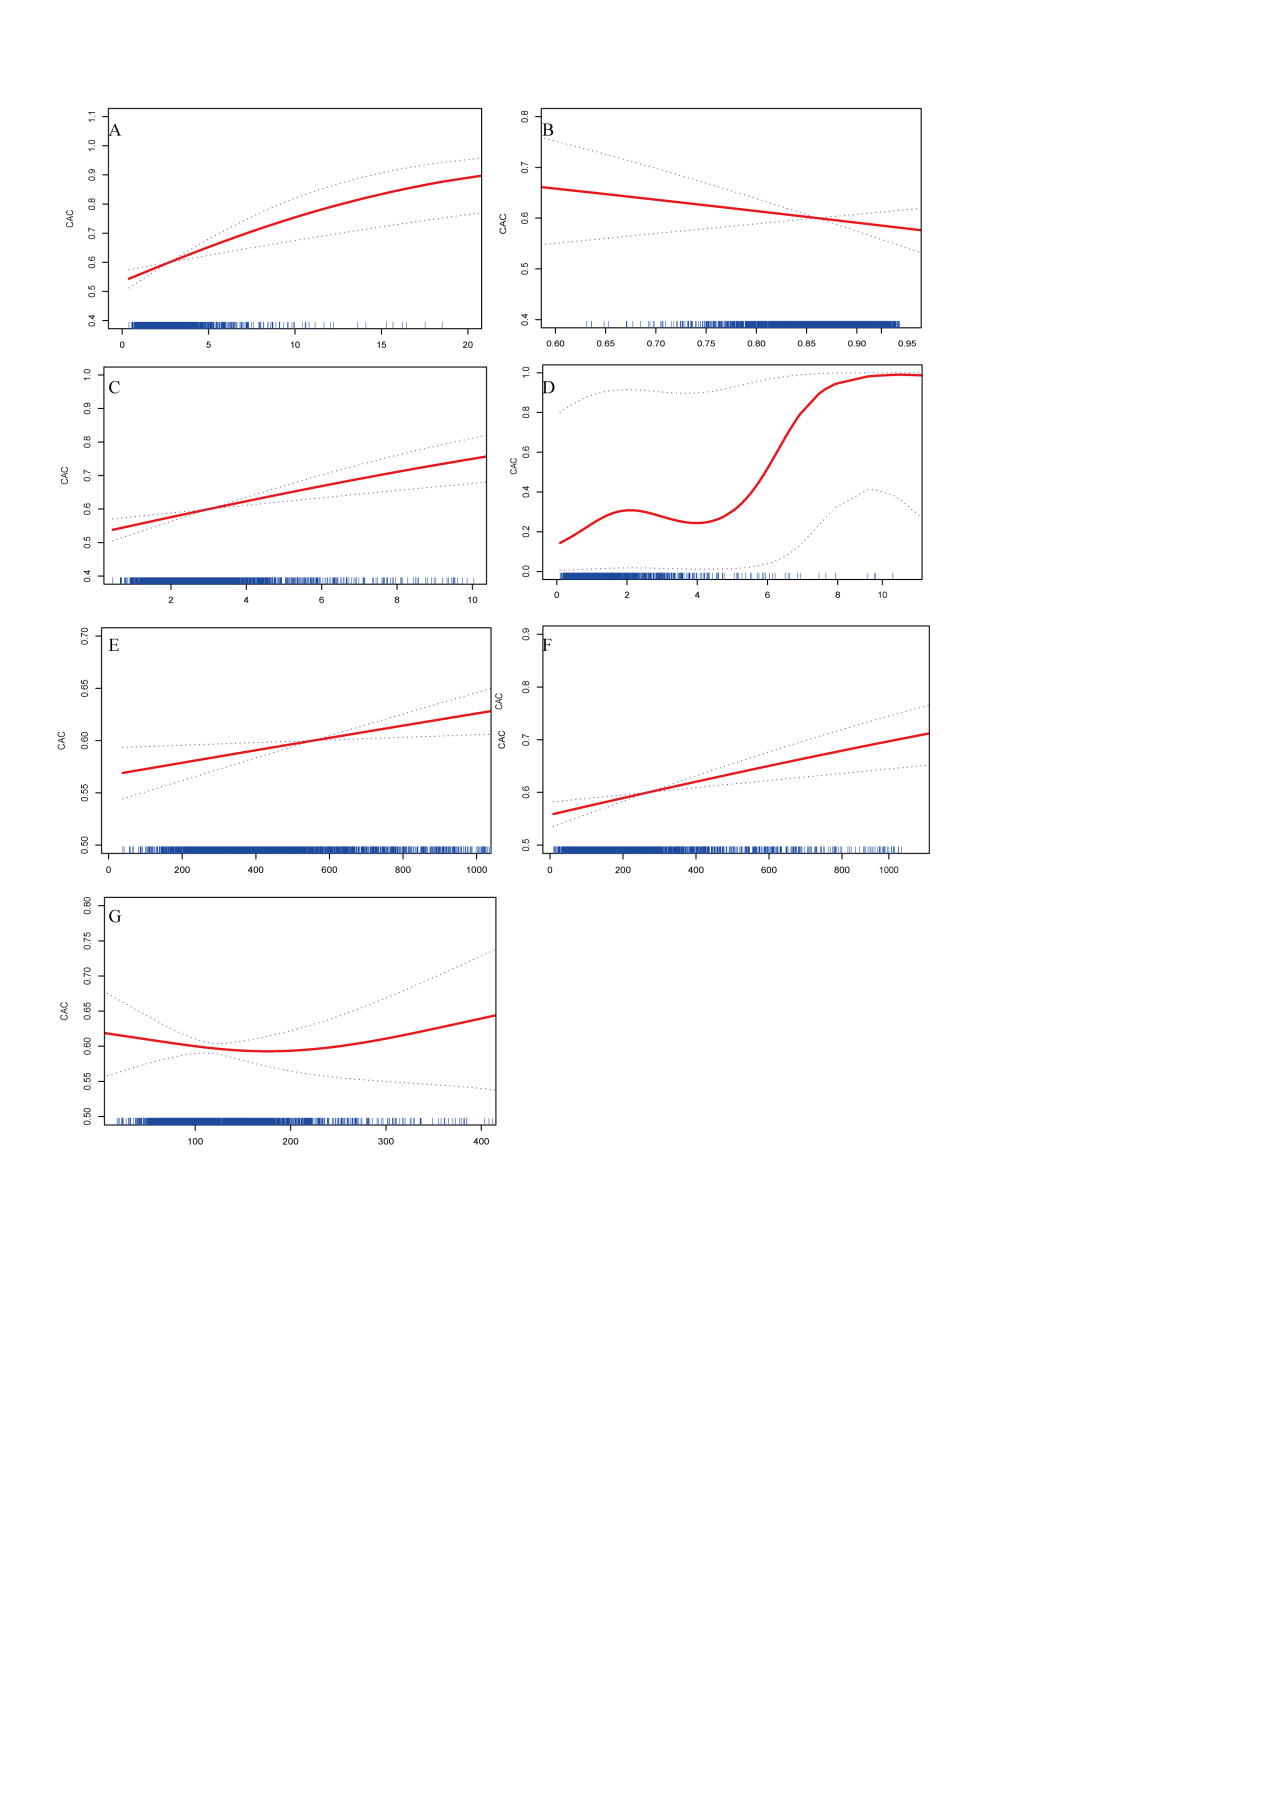


**Supplementary figure 1 The smooth curve fitting diagram of (A)NLR, (B)dNLR, (C)NMLR, (D)SIRI, (E)SII, (F)AISI, (G)PLR.**

AISI(aggregate index of systemic inflammation), dNLR(derived neutrophil to lymphocyte ratio), NLR(neutrophil to lymphocyte ratio), NMLR(neutrophil-monocyte to lymphocyte ratio), PLR(platelet to lymphocyte ratio), SII(systemic immune-inflammation index), SIRI(systemic inflammation response index).
